# Supplementary material
Source: PubMed Central journal article supplement (PMC6238740)
Supplement: jciinsight-3-95076-s081.pdf [file jciinsight-3-95076-s081.pdf]

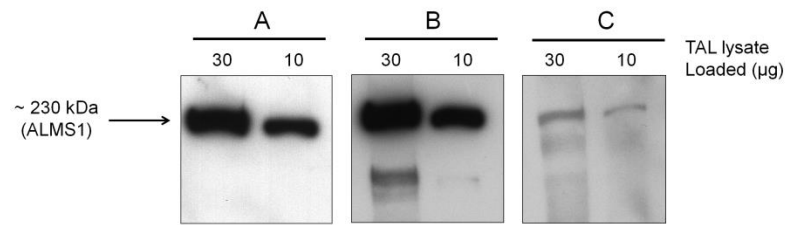

**Supplementary Figure 1: Immuno-blot for ALMS1 in rat thick ascending limb (TAL) with three different antibodies A,B and C.** Representative Western blot for ALMS1 with antibody A: as published (5); B: generated against similar epitope as published (5; EARLEEDSDVTSSEEKAKE); C: generated against amino acids (2174 - 2296) of mouse ALMS1.

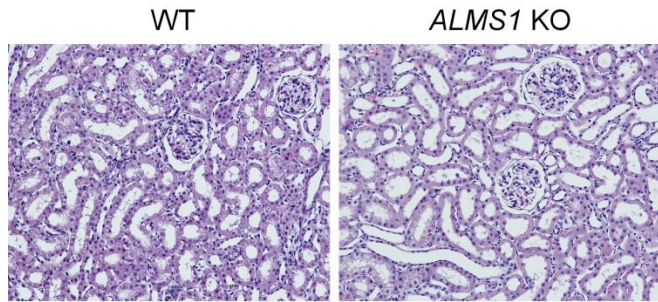

**Supplementary Figure 2: Representative light micrographs of kidney sections from WT and *ALMS1* KO rats.** Representative Hematoxylin and eosin (H&E) staining indicating normal renal histology, n = 3, 20X magnification.

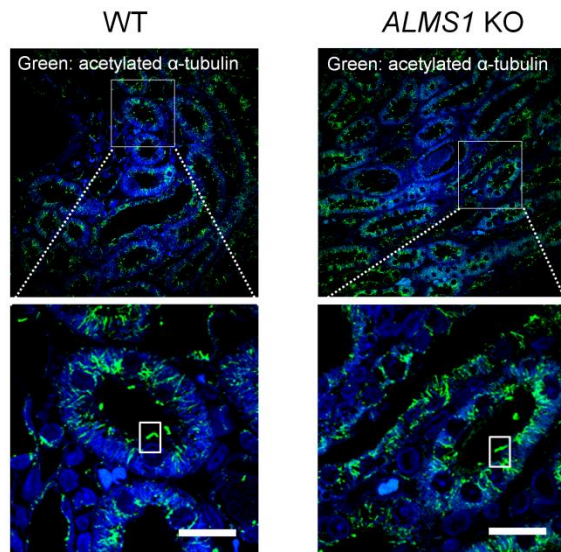

**Supplementary Figure 3: Renal tubular cilia are similar in length from WT and *ALMS1* KO rats.** Representative kidney sections stained for acetylated  $\alpha$ -tubulin and quantified,  $n = 30 - 50$  cilia from 5 sections each, Scale bars =  $15 \mu\text{m}$ .

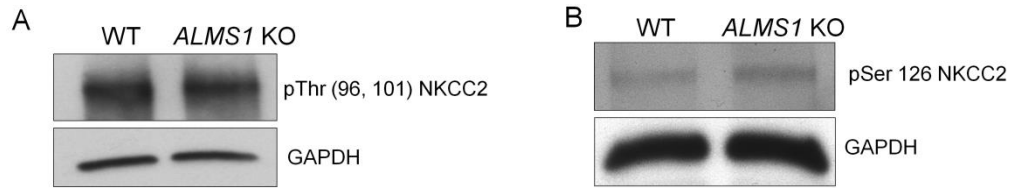

**Supplementary Figure 4: *ALMS1* does not regulate phosphorylation of NKCC2.** A) Representative immunoblot of phosphorylated threonine (96/101) NKCC2 levels showing they are similar in thick ascending limbs (TALs) from WT and *ALMS1* KO rats, n = 3. B) Representative immunoblot of phosphorylated serine (126) NKCC2 levels showing they are similar in TALs from WT and *ALMS1* KO rats, n = 3.

| C-ALMS1 interacting proteins                                    | Role in regulating endocytosis |
|-----------------------------------------------------------------|--------------------------------|
| RAC1: Ras-related C3 botulinum toxin substrate 1                | See Ref (20)                   |
| FLOT 1: Flotillin 1                                             | See Ref (21)                   |
| FLOT 2: Flotillin 2                                             | See Ref (22)                   |
| ANXA 2: Annexin A2                                              | See Ref (23)                   |
| ANXA 1: Annexin A1                                              | See Ref (24)                   |
| PICALM: Phosphatidyl inositol binding clathrin assembly protein | See Ref (25)                   |
| ARPC5L: Actin related protein 2/3 complex, subunit 5-like       | See Ref (26)                   |
| RALA: Ras like proto-oncogene A                                 | See Ref (27)                   |
| ARF 1: ADP ribosylation factor 1                                | See Ref (28)                   |
| ILK: Integrin linked kinase                                     | See Ref (29)                   |
| PHB: Prohibitin                                                 | See Ref (30)                   |
| ACTN 4: $\alpha$ -actinin 4                                     | See Ref (31)                   |
| MYO5B: Myosin 5b                                                | See Ref (12)                   |

**Supplementary Table 1: Carboxyl-terminus ALMS1 (C-ALMS1) interacting proteins and their role in regulating endocytosis.**
